# Supplementary material for: Gold Nanostar-Based Sensitive Catechol Plasmonic Colorimetric Sensing Platform with Ultra-Wide Detection Range
Source: MDPI journal article supplement (doi:10.3390/chemosensors10110439), 2022-10-25
Supplement: s1 [file s1]

## Supporting Information

# Gold Nanostar-Based Sensitive Catechol Plasmonic Colorimetric Sensing Platform with Ultra-Wide Detection Range

Huafeng Wang <sup>1</sup>, Ting Fang <sup>1</sup>, Hua Liu <sup>1</sup>, Tianxiang Wei <sup>2,\*</sup> and Zhihui Dai <sup>1,3,\*</sup>

<sup>1</sup> Jiangsu Collaborative Innovation Center of Biomedical Functional Materials and Jiangsu Key Laboratory of Biofunctional Materials, School of Chemistry and Materials Science, Nanjing Normal University, Nanjing 210023, China

<sup>2</sup> School of Environment, Nanjing Normal University, Nanjing 210023, China

<sup>3</sup> School of Chemistry and Molecular Engineering, Nanjing Tech University, Nanjing 211816, China

\* Correspondence: weitian\_xiang@126.com (T. Wei); daizhihui@njnu.edu.cn (Z. Dai)



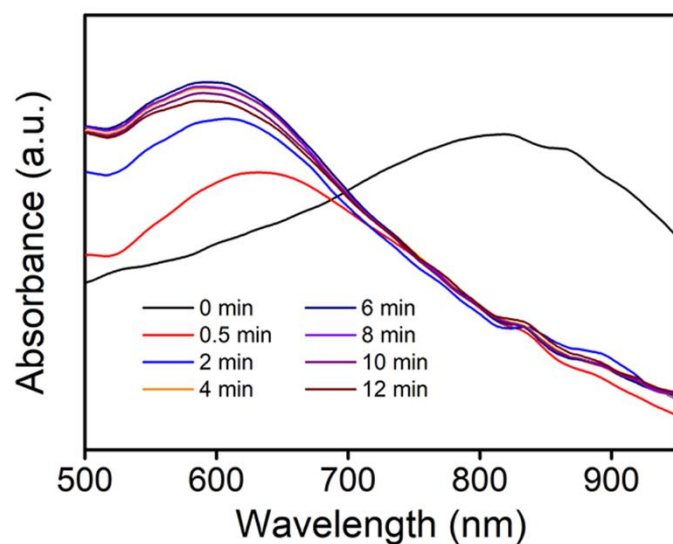

**Figure S1.** UV-vis spectra of 65.0  $\mu\text{M}$  CC-mediated reduction of  $\text{Ag}^+$  on the Au NSs at different reaction times.

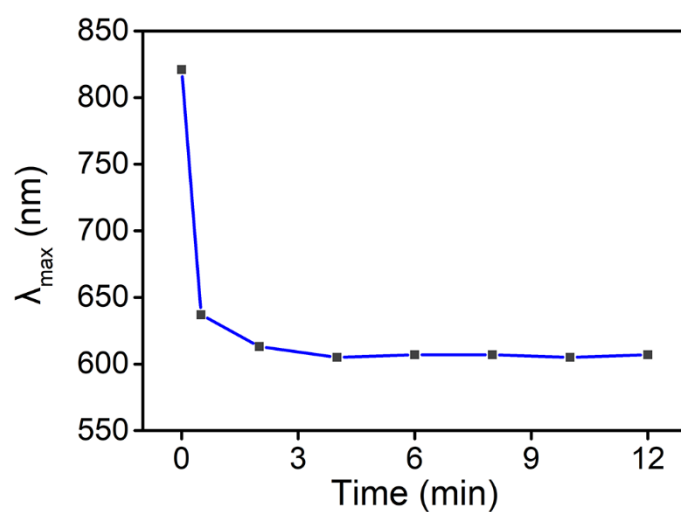

**Figure S2.** The absorption maximum ( $\lambda_{\text{max}}$ ) of 65.0  $\mu\text{M}$  CC-mediated reduction of  $\text{Ag}^+$  on the Au NSs at different reaction times.



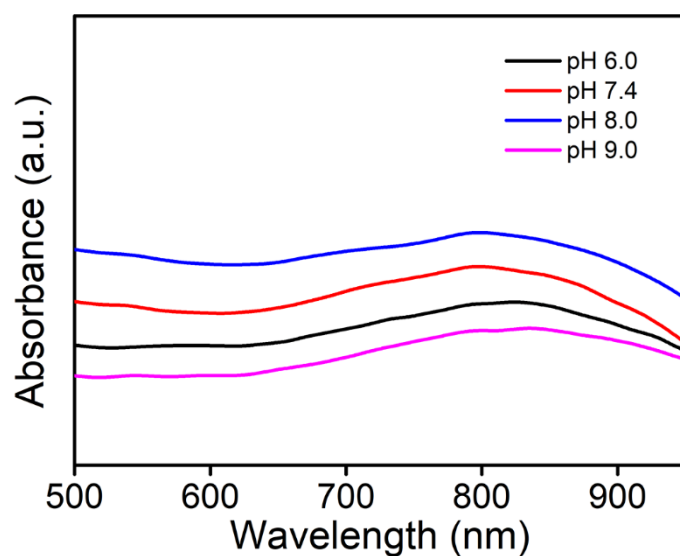

**Figure S3.** UV-vis spectra of the Au NSs-based plasmonic colorimetric sensing platform under various pH.

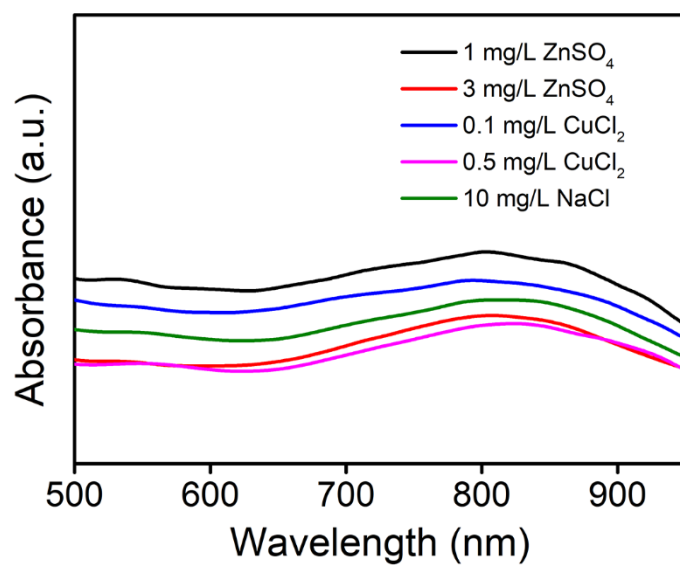

**Figure S4.** UV-vis spectra of the Au NSs-based plasmonic colorimetric sensing platform under various concentrations of metallic ions and ionic strength.



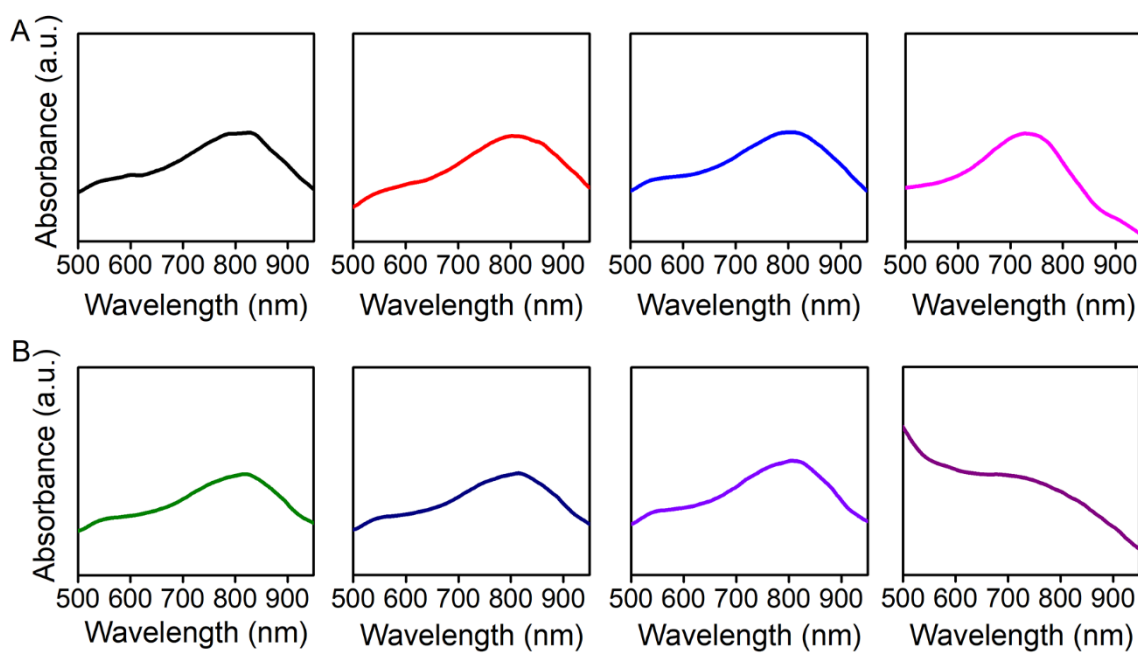

**Figure S5.** UV-vis spectra obtained by the proposed detection system of different spiked condition of 0, 0.0100  $\mu\text{M}$ , 0.100  $\mu\text{M}$ , and 10.0  $\mu\text{M}$  CC (from left to right) in (A) tap water and (B) industrial wastewater.
